# Supplementary material
Source: MDPI journal article supplement (https://www.mdpi.com/2073-4344/11/10/1243)
Supplement: s1 [file s1]

Photocatalytic degradation of antibiotics by superparamagnetic iron oxide nanoparticles.  
Tetracycline case

iron oxide nanoparticles. Tetracycline case

Sunday J. Olusegun, Gonzalo Larrea, Magdalena Osial, Krystyna Jackowska, Pawel  
Krysinski\*

Faculty of Chemistry, University of Warsaw, Pasteur Street 1, 02-093 Warsaw, Poland

\*Correspondence: pakrys@chem.uw.edu.pl

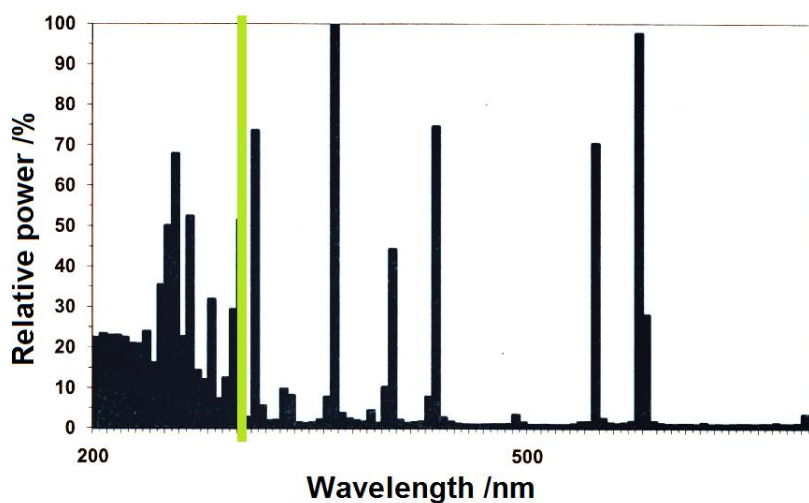

**Figure S1.** The emission spectrum of mercury lamp used in the TC degradation experiments (provided by manufacturer)

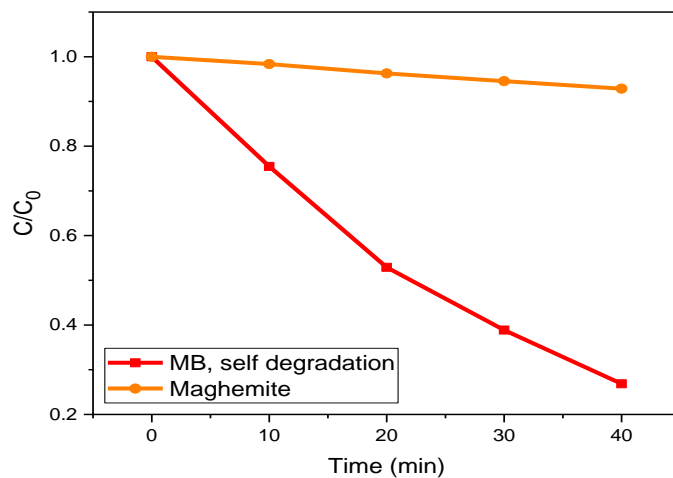

**Figure S2.** Photocatalytic degradation of methylene blue in time of the UV-Vis irradiation in the absence (top line) and presence (bottom line) of maghemite.

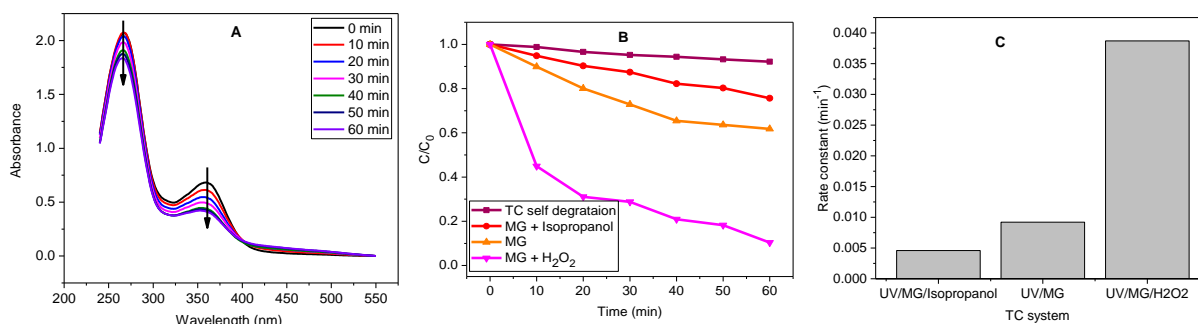

**Figure S3.** UV spectra of TC with MG (A); effect of  $H_2O_2$  and isopropanol of the photocatalytic degradation of TC using MG (B), and rate constants (C).
